# Supplementary material
Source: publisher figshare collection journal article supplement (https://karger.figshare.com/ndownloader/files/17485484)
Supplement: Supplementary file 1 [file 17485484]

Supplementary Table S1. Primers used in this study.

| Target genes or squences | Primer Sequence (5' to 3') |
| --- | --- |
| GAPDH | F: ACCCAGAAGACTGTGGATGG |
| R: ACGCCTGCTTCACCACCTTC |
| AP2 | F: TTTGCTACCAGGAAAGTGGCTGGCAT |
| R: GCAGTGACACCATTCATGACACATTCC |
| C/EBP | F: AAGTCGGTGGACAAGAACAGCAACGAGTA |
| R: ATTGTCACTGGTCAGCTCCAGCACCTT |
| PPARγ | F: CCTTAAACGAAGAGTCATCTTTTAGCG |
| R: GGCTCTTCGTGAGGTTTGTTGTACAG |
| TCONS_00060838 | F : AGCAGACTTAAATCCGCCCC |
| R: GGAAGAACAGTGGGTGTCCC |
| TCONS_00175587 | F: TCTCTGCCTTTCCAGGACGA |
| R: AGGCGTTGCGCGGTTCT |
| TCONS_00101723 | F: CCAGACACTCGGCCTAACAA |
| R: AGAGCACCTACTGAAGAGCAG |
| miRNA-133b | F: ACACTCCAGCTGGGTTTGGTCCCCTTCAACCA |
| miRNA-133-3p | F: ACACTCCAGCTGGGTTGGTCCCCTTCAAC |
| miRNA-7135-3p | F: ACACTCCAGCTGGGATCTGTCTGTGTCTCT |
| Universal Reverse | R: CTCAAGTGTCGTGGAGTCGGCAA |
| U6 | F: GCTTCGGCAGCACATATACTAAAAT |
| R: CGCTTCACGAATTTGCGTGTCAT |

Note:

F: forward primer; R: reverse primer. Universal Reverse primer was used as reverse primer for miRNAs.
